# Supplementary material
Source: Research Square preprint supplement (doi:10.21203/rs.3.rs-8951080/v1)
Supplement: Supplementary file 1 [file 4af35b2c78db3412598f839d.docx]

**Supplementary Material**

**Manuscript: “Navigating Cervical Cancer Care in Maputo: A Mixed-Methods Analysis of Socioeconomic Inequities in Patient Pathways and Health System Barriers”**

**S1. Conceptual and analytical frameworks**

Three complementary frameworks guided analysis and mixed-methods integration. Tanahashi’s health service coverage framework classified health-system bottlenecks across availability, accessibility, acceptability/contact, and effective coverage. The Model of Pathways to Treatment situated delays temporally across appraisal, help-seeking, diagnostic, and treatment phases. The Andersen behavioral model informed the selection of predisposing, enabling, and need-related covariates in quantitative analyses. Availability was explored qualitatively, as no facility-level diagnostic capacity indicators were available in the quantitative dataset.

**Table S1.** Cross-referencing of conceptual frameworks, analytic components, qualitative coding domains, and Stata variable names used for mixed-methods integration.

| **Framework** | **Domain / phase** | **Quantitative indicator** | **Stata variable name(s)** | **Qualitative process codes (examples)** | **Barrier / facilitator coding domains** |
| --- | --- | --- | --- | --- | --- |
| Tanahashi | Availability | Facility diagnostic capacity (qualitative only) | Not available | Equipment shortages; stock-outs; staffing gaps | Health system navigation |
| Tanahashi | Accessibility | Geographic access to first-contact care | dist_phc_km | Travel burden; long distances | Geographic barriers |
| Tanahashi | Accessibility | Affordability barriers at first contact | forgone_cost | Forgone care; delayed visits due to cost | Financial barriers |
| Tanahashi | Acceptability / contact | Difficulty accessing care at first contact | diff_access_bin (derived from diff_access) | Perceived difficulty; communication barriers | Knowledge and perceptions; Social support |
| Tanahashi | Acceptability / contact | Prior cervical examination ever | Exam_ever | Prior screening narratives; prevention knowledge | Knowledge and perceptions |
| Tanahashi | Effective coverage | ≥3 pre-diagnosis visits | visits3 | Repeated visits; referral loops; lost results | Health system navigation |
| Tanahashi | Effective coverage | Navigation burden index (higher = worse) | idx_nav | Administrative waits; fragmented referrals | Health system navigation; Social support |
| Tanahashi | Effective coverage | Prolonged diagnostic delay (≥180 days) | dxdelay180 | Biopsy/pathology delays; missed appointments | Health system navigation; Financial barriers; Geographic barriers |
| Pathways to Treatment | Appraisal | Symptom duration prior to diagnosis | dias_sintomas_dx | Symptom interpretation; normalization | Knowledge and perceptions |
| Pathways to Treatment | Help-seeking | Use of traditional care prior to biomedical contact | trad_care | Alternative care use; delayed biomedical entry | Use of alternative care; Knowledge and perceptions |
| Pathways to Treatment | Help-seeking | Difficulty accessing care at first contact | diff_access_bin | Referral experiences; point-of-entry barriers | Financial barriers; Geographic barriers; Health system navigation |
| Pathways to Treatment | Diagnostic | ≥3 pre-diagnosis visits | visits3 | Repeated visits; fragmented referrals | Health system navigation |
| Pathways to Treatment | Diagnostic | Prolonged diagnostic delay (≥180 days) | dxdelay180 | Biopsy and pathology delays | Health system navigation; Geographic barriers |
| Pathways to Treatment | Treatment | Treatment status at interview (descriptive; no timing indicator available) | tratamento_atual | Scheduling delays; treatment initiation barriers | Health system navigation; Financial barriers; Social support |

Note: Quantitative indicators were derived from the Stata analytic dataset (Base CCU_Pathways.dta; N = 165). Variable names are reported verbatim. Delay and interval analyses that require complete timing information use the timing-complete subsample (N = 164). Composite indices include the accessibility/affordability index (idx_access) and navigation burden index (idx_nav).

# S2. Construction of composite indices

## S2.1 Accessibility/affordability index (idx_access)

The accessibility/affordability index (idx_access) summarised barriers to reaching and paying for first-contact care. It was constructed from three standardized components: difficulty accessing care at first contact (z_diff_access), forgone care due to cost (z_forgone), and use of traditional care prior to biomedical contact (z_trad_care). Components were standardised (mean=0, SD=1) and summed with equal weights. Higher values indicate greater barriers.

## S2.2 Navigation burden index (idx_nav)

The navigation burden index (idx_nav) captured fragmentation and inefficiency during the diagnostic phase. It comprised standardized indicators of ≥3 pre-diagnosis visits (z_visits3) and prolonged diagnostic delay (z_delay180). Components were standardised and summed with equal weights. Higher values indicate worse navigation.

Table S2. Components of composite indices.

| **Index** | **Index variable** | **Standardized components** | **Direction (interpretation)** |
| --- | --- | --- | --- |
| Accessibility/affordability | idx_access | z_diff_access; z_forgone; z_trad_care | Higher = worse (greater barriers) |
| Navigation burden | idx_nav | z_visits3; z_delay180 | Higher = worse (greater burden) |

# S3. Qualitative sampling and coding procedures

Purposeful sampling was used to capture variation by socioeconomic position, geographic access, and diagnostic trajectory. Interviews were analysed using a structured coding architecture with three layers: (1) Tanahashi domain (where the system bottleneck occurred), (2) Pathway phase (when the bottleneck occurred), and (3) Barrier or facilitator domain (mechanism shaping access). Coding consistency was reinforced through iterative team review and consensus discussion.

# S4. Mixed-methods integration

Integration was conducted using joint displays and mechanism-oriented meta-inference. Quantitative gradients in navigation burden (idx_nav) and prolonged diagnostic delay (dxdelay180) were interpreted in relation to qualitative accounts of repeated referrals, lost results, and administrative delays, consistent with failures in effective coverage.

Table S3. Example joint display linking navigation burden to prolonged diagnostic delay.

| **Quantitative pattern** | **Qualitative mechanism (examples)** | **Integrated interpretation** |
| --- | --- | --- |
| Higher idx_nav and higher prevalence of dxdelay180 among lower wealth ranks | Repeated visits; referral loops; lost results; administrative waiting | Effective coverage failures during the diagnostic phase generate fragmented pathways and prolonged delays, disproportionately affecting poorer women |

# S5. Missing data assessment

Item non-response was generally low (typically ≤1%) for core indicators used in primary analyses. Analyses were conducted on a complete-case basis. Self-reported household income (renda_model) had substantial non-response (n=92, 56.4%) and was excluded from adjusted models.

Table S4. Key variables and analytic handling of missing data.

| **Variable (label)** | **Stata name** | **Missingness (summary)** | **Analytic use** |
| --- | --- | --- | --- |
| Wealth quintile | riqueza_q | ≤1% (typically 0–1 record) | Ranking variable for equity estimation; covariate |
| Distance to PHC (km) | dist_phc_km | ≤1% | Indicator / covariate |
| Forgone care due to cost | forgone_cost | ≤1% | Indicator; idx_access component (via z_forgone) |
| Traditional care use | trad_care | ≤1% | Indicator; idx_access component (via z_trad_care) |
| Difficulty accessing care (binary) | diff_access_bin | ≤1% | Indicator; idx_access component (via z_diff_access) |
| ≥3 pre-diagnosis visits | visits3 | ≤1% | Indicator; idx_nav component (via z_visits3) |
| Prolonged diagnostic delay (≥180 days) | dxdelay180 | ≤1% | Primary outcome; idx_nav component (via z_delay180) |
| Monthly household income (missing if prefer not) | renda_model | 92 (56.4%) | Excluded from adjusted models |

# S6. Reporting standards and checklists

The quantitative observational component was reported in accordance with STROBE guidelines, and the qualitative interview component followed COREQ reporting standards. Completed checklists are provided as separate supplementary files where required by the submission portal.
